# Supplementary material
Source: Springer Nature journal article supplement (https://www.springermedizin.de/resource/supplementary/12884_2012_702_MOESM4_ESM.pdf/9458512)
Supplement: MOESM4 [file 9458512]

**Table 1. Background characteristics of primiparous women aged 25-31 years (reference group) and  $\geq 32$  years (advanced age), and for representativeness; comparisons between a sub-sample giving birth in 2003 and all primiparous women aged  $\geq 25$  years in Norway in 2003 (P-value for differences between a sub-sample from 2003 and all Norwegian primiparous women  $> 25$  years giving birth in 2003).**

|                                          | Women in the study |               |               | Women $\geq 25$ years giving birth in 2003 |               | P-value |
|------------------------------------------|--------------------|---------------|---------------|--------------------------------------------|---------------|---------|
|                                          | Age 25-31          | Age $\geq 32$ | All           | Sub-sample                                 | Norway        |         |
|                                          | n=21 226<br>%      | n=8839<br>%   | n=30 065<br>% | n=3549<br>%                                | n=16 760<br>% |         |
| <i>Demographic and social factors</i>    |                    |               |               |                                            |               |         |
| Age (years)*                             |                    |               |               |                                            |               | 0.07    |
| 25-29                                    |                    |               | 50.8          | 55.2                                       | 54.0          |         |
| 30-34                                    |                    |               | 37.6          | 35.2                                       | 35.1          |         |
| 35-39                                    |                    |               | 10.3          | 8.8                                        | 9.6           |         |
| $\geq 40$                                |                    |               | 1.3           | 0.8                                        | 1.2           |         |
| Smoking*                                 | 8.4                | 7.6           | 8.2           | 10.8                                       | 13.9          | <0.001  |
| Single status*                           | 2.9                | 4.9           | 3.5           | 2.7                                        | 5.7           | <0.001  |
| Native language other than Norwegian     | 5.9                | 8             | 6.5           | 4.7                                        |               |         |
| Unemployed                               | 1.7                | 1.6           | 1.7           |                                            |               |         |
| Income (NOR)**                           |                    |               |               |                                            |               |         |
| <200 000                                 | 11.2               | 6             | 8.7           |                                            |               |         |
| 200 000-399 999                          | 55.5               | 43.7          | 51.5          |                                            |               |         |
| $\geq 400 000$                           | 29.1               | 46            | 33.7          |                                            |               |         |
| Pregravid BMI, mean (kg/m <sup>2</sup> ) | 23.6               | 24.1          | 23.8          |                                            |               |         |
| IVF present pregnancy*                   | 2.6                | 8.9           | 4.4           | 3.8                                        | 4.9           | <0.001  |
| <i>Labour*</i>                           |                    |               |               |                                            |               |         |
| Mode of delivery                         |                    |               |               |                                            |               |         |
| Vacuum                                   | 14.2               | 16            | 14.8          | 14.1                                       | 13.7          | 0.54    |
| Forceps                                  | 2.8                | 3.4           | 3             | 2.7                                        | 2.4           | 0.27    |
| Elective cesarean delivery               | 3.1                | 6             | 4             | 3.8                                        | 5.3           | <0.001  |
| Emergency cesarean delivery              | 9.7                | 13.5          | 10.8          | 11.4                                       | 12.5          | 0.06    |
| Unspecified cesarean delivery            | 1.9                | 2.9           | 2.2           | 1.2                                        | 2.5           | <0.001  |
| Prematurity***                           | 5.5                | 6.4           | 5.8           | 6.5                                        | 8.8           | <0.001  |
| Neonatal transfer                        | 9.2                | 10.8          | 9.3           | 10.8                                       | 12.5          | <0.001  |

\* Data from the Norwegian Medical Birth Register

\*\* NKR: NOK/GBP = 10.90

\*\*\* Prematurity: 22-36 weeks of pregnancy
